# Supplementary material for: The Effect of Salvia Officinalis Disinfectant on Biological Characteristics
Source: Research Square preprint supplement (doi:10.21203/rs.3.rs-1264016/v1), 2022-01-31

**Table 1: Mean counts and S.D. of the**

**inflammatory cells in response to the tested**

**materials and controls and control following**

**the selected period's interval.**


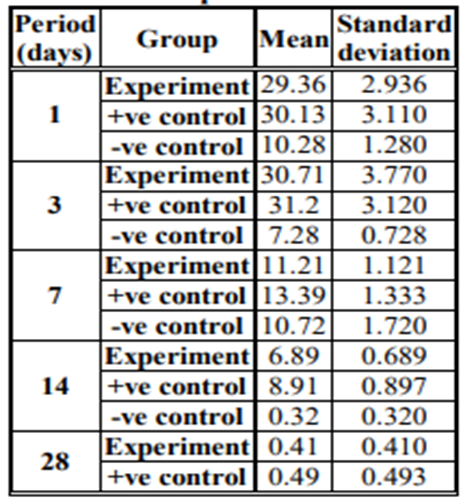

Supplement: Supplementary file 1 [file 3ad2c8d056ea6587d698ffb6.docx]
